# Supplementary material
Source: Springer Nature journal article supplement (https://www.springermedizin.de/resource/supplementary/12885_2006_648_MOESM3_ESM.pdf/9469984)

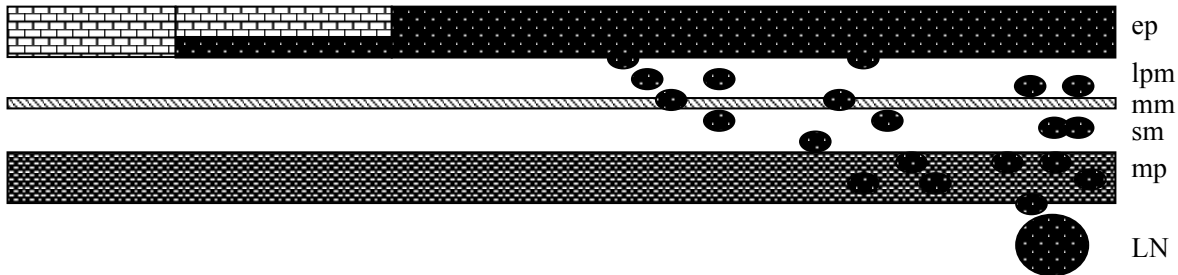

|← 1 →||← 2 →||← 3 →||← 4 →||← 5 →||← 6 →|

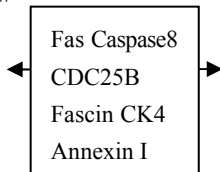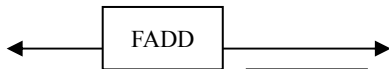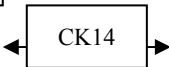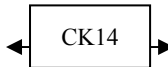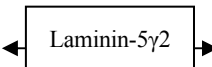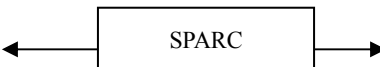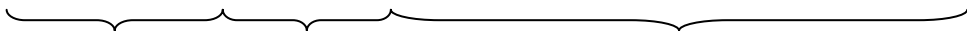

“Early” changes

“Intermediate” changes

“Late” changes

Supplement: MOESM3 [file 9469984]
